# Supplementary material
Source: PubMed Central journal article supplement (PMC3362361)
Supplement: supp_blood-2011-11-392324_blood-2011-11-392324-1.pdf [file supp_blood-2011-11-392324_blood-2011-11-392324-1.pdf]

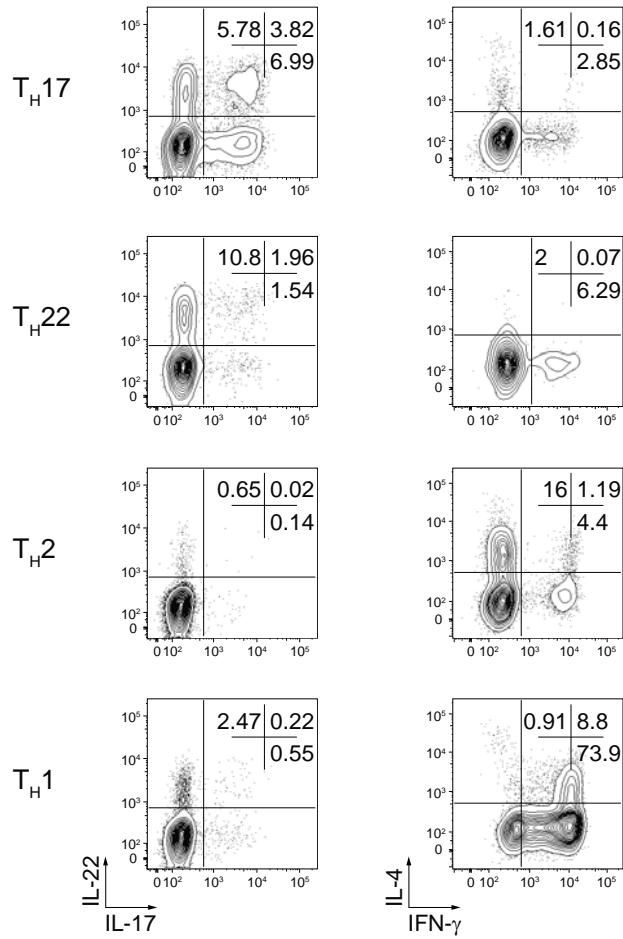

### Supplemental Figure 1. Cytokine production by T<sub>H</sub> subsets.

Flow cytometric analysis of cytokine production by the indicated T<sub>H</sub> cell subsets stimulated for 5h with PMA/ionomycin. Data are representative of six independent experiments.

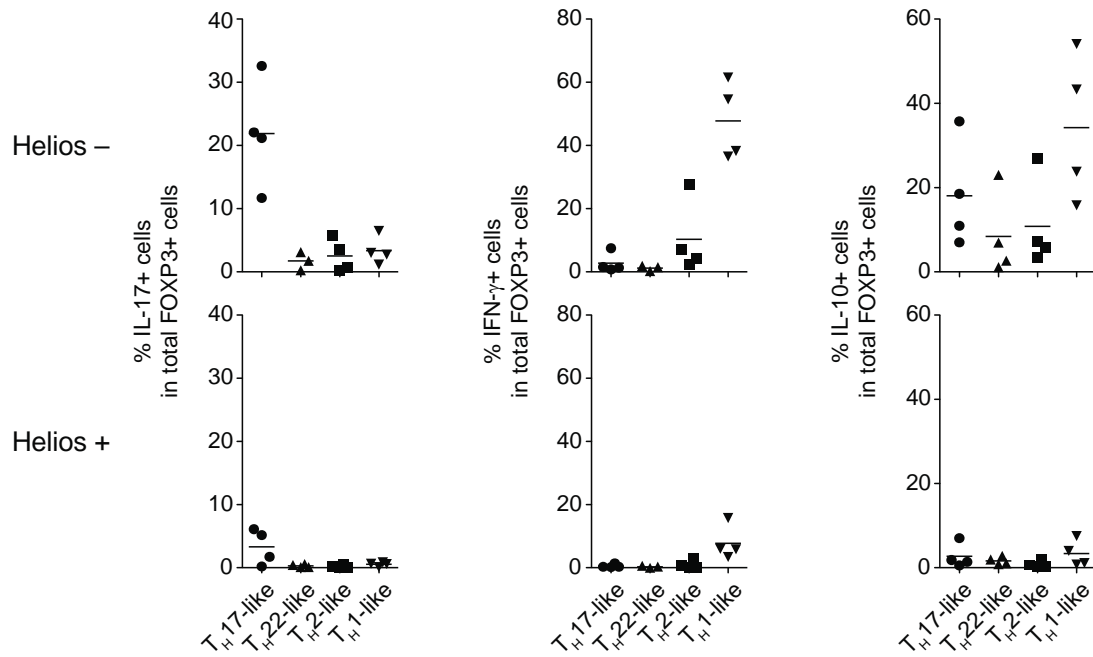

**Supplemental Figure 2. IL-17-, IFN- $\gamma$ - and IL-10-producing Treg cells are predominantly Helios<sup>-</sup>.**

Frequency of IL-17-, IFN- $\gamma$ - and IL-10-producing cells among gated FOXP3<sup>+</sup>Helios<sup>+/-</sup> cells from the indicated Treg cell subsets stimulated for 5h with PMA/ionomycin. Each symbol represents one donor; horizontal bars indicate the mean. Data are from four donors.

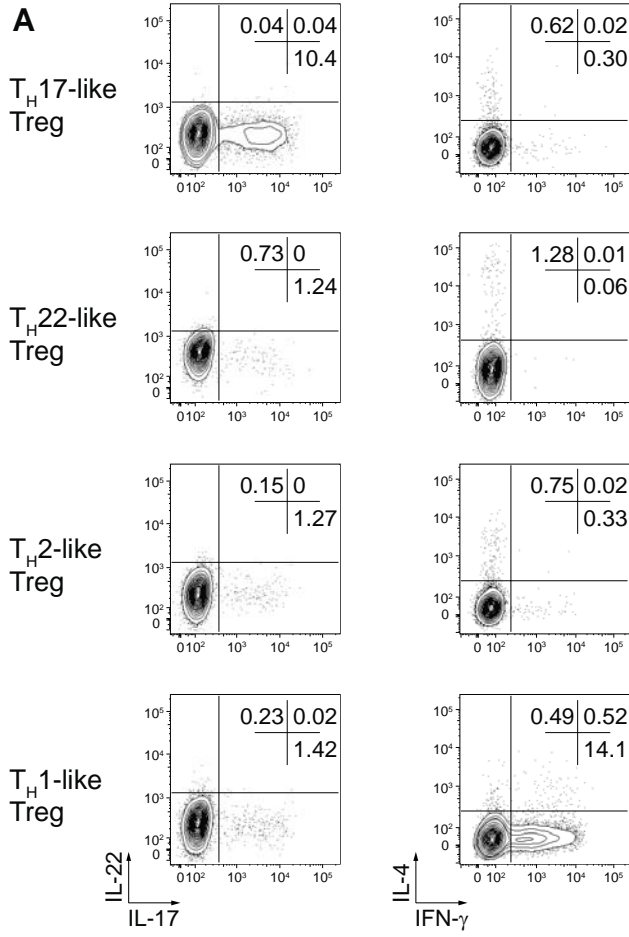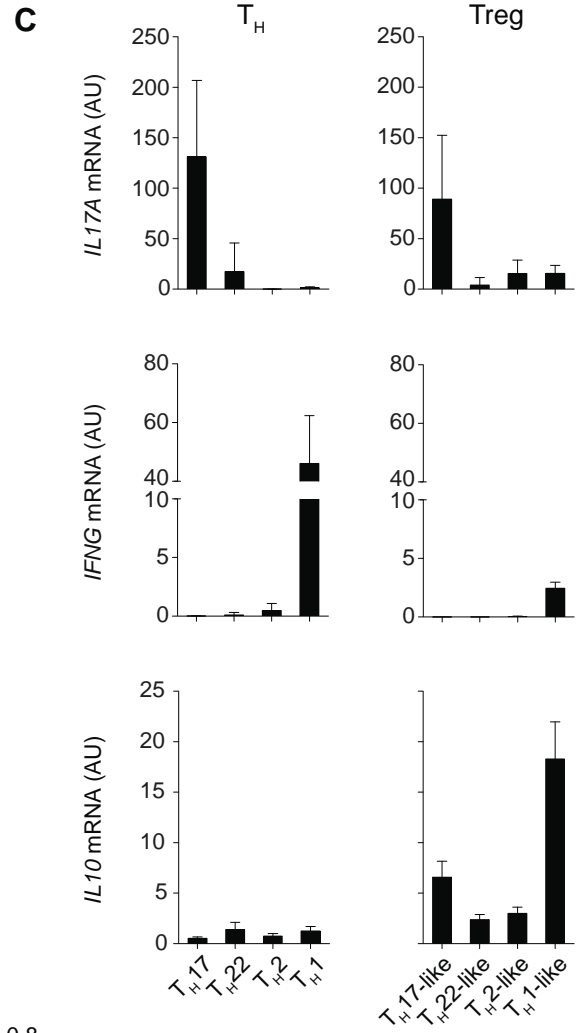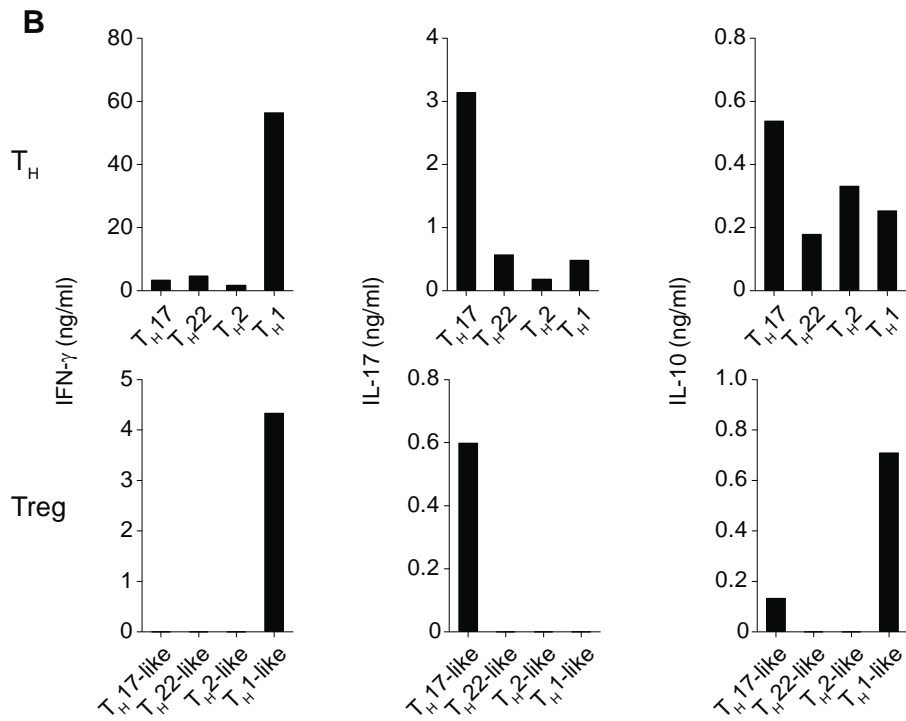

**Supplemental Figure 3. Treg cell subsets express *IL17A*, *IFNG* and *IL10* mRNA directly *ex vivo* but do not produce IL-22 and IL-4.**

(A) Flow cytometric analysis of cytokine production by the indicated Treg cell subsets stimulated for 5h with PMA/ionomycin. Data are representative of six independent experiments. (B) Cytokine production by the indicated T<sub>H</sub> and Treg cells subsets stimulated for 24h with PMA/ionomycin and measured by ELISA. Data are representative of four independent experiments. (C) Real-time RT-PCR analysis of IL-17A (*IL17A*), IFN- $\gamma$  (*IFNG*) and IL-10 (*IL10*) mRNA expression by the indicated T<sub>H</sub> and Treg cell subsets. AU, arbitrary units. Data are mean  $\pm$  SEM of five donors.

**A**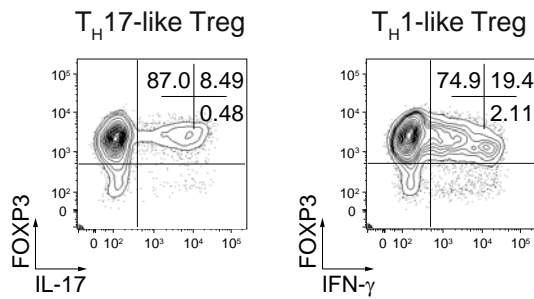**B**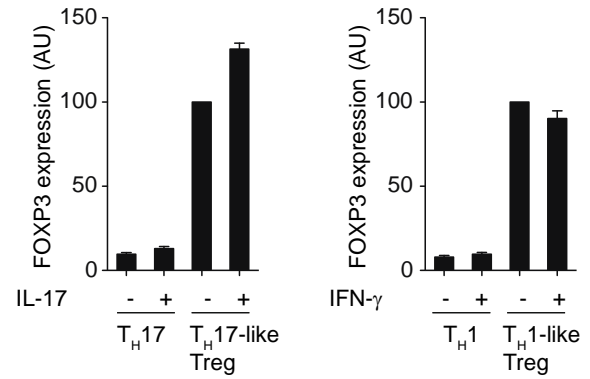

**Supplemental Figure 4. IL-17 and IFN-γ production by T<sub>H</sub>17-like and T<sub>H</sub>1-like Treg cells is not due to decreased FOXP3 expression.**

(A) Flow cytometric analysis of cytokine production by the indicated Treg cell subsets stimulated for 5h with PMA/ionomycin. Data are representative of six independent experiments. (B) Analysis of FOXP3 expression levels in cytokine<sup>+</sup> or cytokine<sup>-</sup> T<sub>H</sub>17-like and T<sub>H</sub>1-like Treg cells. For each donor, the MFI of FOXP3 staining in cytokine<sup>-</sup> T<sub>H</sub>17-like or T<sub>H</sub>1-like Treg cells was set to 100. AU, arbitrary units. Data are mean ± SEM of eight donors.

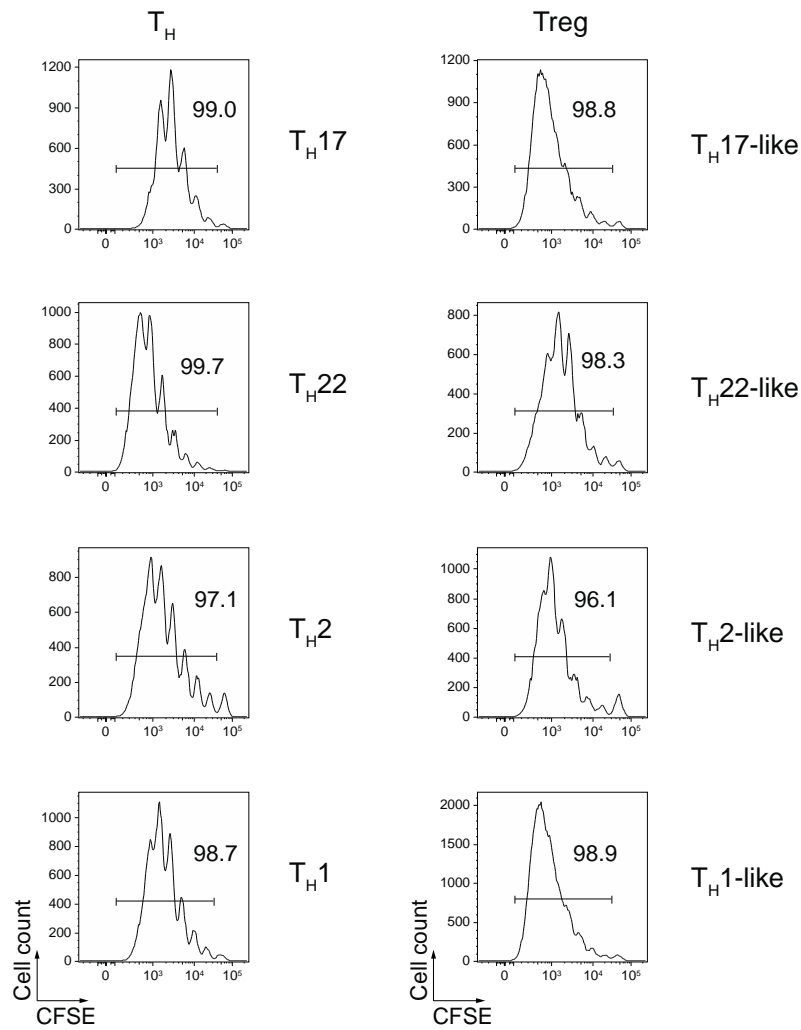

**Supplemental Figure 5. All T<sub>H</sub> and Treg cell subsets proliferate in response to CD3/CD28 stimulation.**

Proliferation of CFSE-labeled T<sub>H</sub> and Treg cell subsets isolated by cell sorting and stimulated with autologous monocytes in the presence of anti-CD3 and anti-CD28 antibodies. For Treg cells, IL-2 (20 U/ml) was added to the cultures at day 0 and day 2. CFSE dilution was analyzed after 6 days.
